# Supplementary material for: Postdeployment Behavioral Health Screens and Linkage to the Veterans Health Administration for Army Reserve Component Members
Source: Atypon-hosted journal article supplement (doi:10.1176/appi.ps.201600259), 2017-04-17
Supplement: appi.ps.201600259.ds001.pdf [file appi.ps.201600259.ds001.pdf]

## Supplement

Table A Alcohol use disorder, depression, and PTSD diagnoses, treatment, and medications

| Condition            | Diagnosis (ICD-9 codes) |                             | Specialty care treatment |                                                                                  | Medications                                      |
|----------------------|-------------------------|-----------------------------|--------------------------|----------------------------------------------------------------------------------|--------------------------------------------------|
| Alcohol use disorder | Code                    | Name                        | Clinic stop code number  | Clinic stop code name                                                            | Medication name                                  |
|                      | 291                     | Alcohol psychoses           | 513                      | Substance use disorder – individuals                                             | Disulfiram                                       |
|                      | 303                     | Alcohol dependence syndrome | 514                      | Substance use disorder – home visit                                              | Naltrexone oral                                  |
|                      | 305.0                   | Nondependent alcohol abuse  | 519                      | Substance use disorder/PTSD teams                                                | Extended-release Naltrexone injection (Vivitrol) |
|                      |                         |                             | 523                      | Opioid substitution                                                              | Acamprosate                                      |
|                      |                         |                             | 545                      | Telephone substance use disorder                                                 | Topiramate                                       |
|                      |                         |                             | 547                      | Intensive substance use disorder –group                                          |                                                  |
|                      |                         |                             | 548                      | Intensive substance use disorder – individual                                    |                                                  |
|                      |                         |                             | 560                      | Substance use disorder – group                                                   |                                                  |
|                      |                         |                             | Bed-section number       | Bed-section description                                                          |                                                  |
|                      |                         |                             | 27                       | Substance abuse residential treatment program                                    |                                                  |
|                      |                         |                             | 29                       | Substance abuse compensated work therapy/transitional residence (CWT/TR) program |                                                  |
|                      |                         |                             | 72                       | Alcohol dependence – high intensity                                              |                                                  |
|                      |                         |                             | 73                       | Drug dependence – high intensity                                                 |                                                  |
|                      |                         |                             | 74                       | Substance abuse – high intensity                                                 |                                                  |
|                      |                         |                             | 84                       | Substance abuse intermediate care                                                |                                                  |
|                      |                         |                             | 86                       | Domiciliary substance abuse                                                      |                                                  |

|            |             |                                                  |                                |                                                                                           |                           |
|------------|-------------|--------------------------------------------------|--------------------------------|-------------------------------------------------------------------------------------------|---------------------------|
|            |             |                                                  | 90                             | Substance abuse star I, II & III                                                          |                           |
|            |             |                                                  | 111                            | Substance abuse residential program                                                       |                           |
| Depression | <b>Code</b> | <b>Name</b>                                      | <b>Clinic stop code number</b> | <b>Clinic stop code name</b>                                                              | <b>Medication name</b>    |
|            | 300.4       | Dysthymic disorder                               | 292                            | Observation psychiatry                                                                    | <b><u>First line:</u></b> |
|            | 293.83      | Mood disorder in conditions classified elsewhere | 502                            | Mental health clinic individual                                                           | Citalopram                |
|            | 301.12      | Chronic depressive personality disorder          | 503                            | Mental health residential care individual                                                 | Escitalopram              |
|            | 298.0       | Depressive type psychosis                        | 505                            | Day treatment – individual                                                                |                           |
|            | 311         | Depressive disorder, not elsewhere classified    | 506                            | Day hospital – individual                                                                 | Fluoxetine                |
|            | 312         | Disturbance of conduct                           | 508                            | Health Care for Homeless Veterans (HCHV)/Homeless Chronically Mentally Ill (HCMI) – group | Paroxetine                |
|            | 296.9       | Other and unspecified affective psychoses        | 509                            | Psychiatry – individual                                                                   | Sertraline                |
|            | 297         | Paranoid states                                  | 510                            | Psychology – individual                                                                   | Duloxetine                |
|            | 309.0       | Adjustment disorder, depressive                  | 512                            | Mental health consultation                                                                | Venlafaxine               |
|            | 309.1       | Depressive reaction prolonged                    | 520                            | Long-term enhancement - individual                                                        | Bupropion                 |
|            | 309.2       | With predominant disturbance of other emotions   | 521                            | Long-term enhancement - group                                                             | Mirtazapine               |
|            | 296.2       | Major depression, single episode                 | 525                            | Women’s stress disorder treatment teams                                                   |                           |
|            | 296.3       | Major depression, recurrent episode              | 526                            | Telephone/special psychiatry                                                              | <b><u>Broad:</u></b>      |
|            | 296.4       | Bipolar affective disorder, manic                | 527                            | Telephone mental health                                                                   | Citalopram                |
|            |             |                                                  | 528                            | Telephone/HCMI                                                                            | Escitalopram              |
|            |             |                                                  | 529                            | HCHV/HCMI – individual                                                                    | Fluoxetine                |
|            |             |                                                  | 531                            | Mental health primary care team - individual                                              | Paroxetine                |

|  |  |     |                                                                                                               |                 |
|--|--|-----|---------------------------------------------------------------------------------------------------------------|-----------------|
|  |  | 532 | Psychosocial rehabilitation - individual                                                                      | Sertraline      |
|  |  | 533 | Mental health intervention biomedical care – individual                                                       | Duloxetine      |
|  |  | 534 | Mental health integrated care – individual                                                                    | Venlafaxine     |
|  |  | 537 | Telephone/psychosocial rehabilitation                                                                         | Bupropion       |
|  |  | 538 | Psychological testing                                                                                         | Mirtazapine     |
|  |  | 539 | Mental health integrated care group                                                                           | Amitriptyline   |
|  |  | 546 | Telephone mental health intensive case management (MHICM) – individual                                        | Doxepin         |
|  |  | 550 | Mental health clinic (group)                                                                                  | Imipramine      |
|  |  | 551 | Intensive psychiatric community care (IPCC) community clinic/day program visit                                | Trimipramine    |
|  |  | 552 | MHICM – individual                                                                                            | Desipramine     |
|  |  | 553 | Day treatment – group                                                                                         | Nortriptyline   |
|  |  | 554 | Day hospital – group                                                                                          | Protriptyline   |
|  |  | 557 | Psychiatry – group                                                                                            | Amoxapine       |
|  |  | 558 | Psychology – group                                                                                            | Maprotiline     |
|  |  | 559 | Psychosocial rehabilitation - group                                                                           | Isocarboxazid   |
|  |  | 563 | Primary care/special psychiatry, Mental health primary care team -- group, Mental health primary care - group | Phenelzine      |
|  |  |     |                                                                                                               | Selegiline      |
|  |  |     |                                                                                                               | Tranlycypromine |
|  |  |     |                                                                                                               |                 |
|  |  | 564 | Mental health team case management                                                                            | Trazodone       |
|  |  | 565 | Mental health intervention biomedical care – group                                                            | Nefazodone      |
|  |  | 566 | Mental health risk-factor reduction educational – group                                                       | Desvenlafaxine  |
|  |  | 567 | MHICM – group                                                                                                 |                 |
|  |  | 571 | Services for returning veterans – mental health (SeRV-MH) – individual                                        |                 |
|  |  | 572 | SeRV-MH – group                                                                                               |                 |

|  |  |                         |                                                                  |  |
|--|--|-------------------------|------------------------------------------------------------------|--|
|  |  | 573                     | Mental health incentive therapy face-to-face                     |  |
|  |  | 576                     | Psycho-geriatric clinic – individual                             |  |
|  |  | 577                     | Psycho-geriatric clinic – group                                  |  |
|  |  | 578                     | Psychogeriatric day program                                      |  |
|  |  | 579                     | Telephone psycho-geriatrics                                      |  |
|  |  | 582                     | Psychosocial rehabilitation recovery center (PRRC) – individual  |  |
|  |  | 583                     | PRRC – group                                                     |  |
|  |  | 584                     | Telephone PRRC                                                   |  |
|  |  | 586                     | Residential rehabilitation treatment program (RRTP) – individual |  |
|  |  | 587                     | RRTP – group                                                     |  |
|  |  | 588                     | RRTP aftercare – individual                                      |  |
|  |  | 594                     | RRTP aftercare - community                                       |  |
|  |  | 595                     | RRTP aftercare – group                                           |  |
|  |  | 596                     | RRTP admission screening services                                |  |
|  |  | 597                     | Telephone/RRTP                                                   |  |
|  |  | 598                     | RRTP pre-admission – individual                                  |  |
|  |  | 599                     | RRTP pre-admission – group                                       |  |
|  |  | <b>Bed section code</b> | <b>Bed-section description</b>                                   |  |
|  |  | 25                      | Psychiatric residential rehabilitation treatment program         |  |
|  |  | 33                      | GEM psychiatric beds                                             |  |
|  |  | 70                      | Acute psychiatry (< 45 days)                                     |  |
|  |  | 71                      | Long term psychiatry (> 45 days)                                 |  |
|  |  | 76                      | Psychiatric mentally infirm                                      |  |
|  |  | 77                      | PRRTP                                                            |  |
|  |  | 92                      | Psychiatry – general internal                                    |  |

|      |             |                                                                    |                                |                                                                 |                           |
|------|-------------|--------------------------------------------------------------------|--------------------------------|-----------------------------------------------------------------|---------------------------|
|      |             |                                                                    | 93                             | High intensity general psychiatry inpatient                     |                           |
|      |             |                                                                    | 94                             | Psychiatric observation                                         |                           |
|      |             |                                                                    | 109                            | Psychiatric residential rehabilitation program                  |                           |
| PTSD |             | Same as depression (above), plus PTSD-specific items listed below. |                                |                                                                 |                           |
|      | <b>Code</b> | <b>Name</b>                                                        | <b>Clinic stop code number</b> | <b>Clinic stop code name</b>                                    | <b>Medication name</b>    |
|      | 309.81      | Post-traumatic stress disorder                                     | 516                            | PTSD – group                                                    | <u><b>First line:</b></u> |
|      |             |                                                                    | 519                            | Substance use disorder/PTSD teams                               | Fluoxetine                |
|      |             |                                                                    | 540                            | PTSD clinical team (PCT) post-traumatic stress – individual     | Paroxetine                |
|      |             |                                                                    | 541                            | PTSD Post-traumatic stress                                      | Sertraline                |
|      |             |                                                                    | 542                            | Telephone PTSD                                                  | Fluvoxamine               |
|      |             |                                                                    | 561                            | PCT – post-traumatic stress – group                             | Citalopram                |
|      |             |                                                                    | 562                            | PTSD – individual                                               | Escitalopram              |
|      |             |                                                                    | 580                            | PTSD day hospital                                               | Venlafaxine               |
|      |             |                                                                    | 581                            | PTSD day treatment                                              | Mirtazapine               |
|      |             |                                                                    | 582                            | Psychosocial rehabilitation recovery center (PRRC) – individual | Nefazodone                |
|      |             |                                                                    | <b>Bed-section code</b>        | <b>Bed-section description</b>                                  | Imipramine                |
|      |             |                                                                    | 26                             | PTSD residential rehabilitation program                         | Amitriptyline             |
|      |             |                                                                    | 79                             | Specialty inpatient PTSD unit                                   | Desipramine               |
|      |             |                                                                    | 91                             | Evaluation and brief treatment PTSD unit (EBTPU)                | Nortriptyline             |
|      |             |                                                                    | 110                            | PTSD residential rehabilitation program                         | Protriptyline             |
|      |             |                                                                    |                                |                                                                 | Clomipramine              |
|      |             |                                                                    |                                |                                                                 | Phenelzine                |
|      |             |                                                                    |                                |                                                                 | Tranylcypromine           |
|      |             |                                                                    |                                |                                                                 |                           |
|      |             |                                                                    |                                |                                                                 |                           |
|      |             |                                                                    |                                |                                                                 |                           |

|  |  |  |  |  |               |
|--|--|--|--|--|---------------|
|  |  |  |  |  | <b>Broad:</b> |
|  |  |  |  |  | Prazosin      |
|  |  |  |  |  | Duloxetine    |

PTSD = Posttraumatic Stress Disorder

### *Description of control variables*

Demographic characteristics from the Defense Enrollment Eligibility Reporting System (DEERS) included age, marital status, and race/ethnicity. Deployment and demobilization characteristics from the Contingency Tracking System (CTS) and DEERS included rank, number of deployments prior to index deployment, probable serious injury during index deployment, cohort (FY of demobilization date between 2008-11), repeat deployment in post-index year, residence region at end of index deployment, and length (in months) of index deployment. Health and healthcare measures constructed from the Military Health System (MHS) Data Repository and PDHRA included hospitalized since last deployment, wounded, injured, assaulted, or hurt on last deployment, DoD provided health insurance (i.e., TRICARE) after index deployment, conflict with spouse/family, and gap (in months) between the demobilization date and index PDHRA date. Additional healthcare predictor variables were created using information from the VHA Enrollment File and National Patient Care Databases: received pre-demobilization VHA services as an enrollee in the VHA system, received pre-demobilization services as a non-enrollee in the VHA system, received post-demobilization, pre-PDHRA VHA services as a non-enrollee, and drive time (in hours) to nearest VHA facility with primary care.

Table B Characteristics<sup>a</sup> of ARNG and AR

|                                                                                 | <b>ARNG<br/>women<br/>N=4,209</b> |          | <b>ARNG<br/>men<br/>N=48,799</b> |          | <b>AR<br/>women<br/>N=2,903</b> |          | <b>AR<br/>Men<br/>N=17,253</b> |          |
|---------------------------------------------------------------------------------|-----------------------------------|----------|----------------------------------|----------|---------------------------------|----------|--------------------------------|----------|
| <b>Categorical variables</b>                                                    | <b>N</b>                          | <b>%</b> | <b>N</b>                         | <b>%</b> | <b>N</b>                        | <b>%</b> | <b>N</b>                       | <b>%</b> |
| Married                                                                         | 1,274                             | 30.27    | 25,285                           | 51.81    | 900                             | 34.10    | 8,998                          | 52.15    |
| <b>Race/ethnicity</b>                                                           |                                   |          |                                  |          |                                 |          |                                |          |
| Non-Hispanic White                                                              | 2,679                             | 63.65    | 38,632                           | 79.17    | 1,582                           | 54.50    | 12,135                         | 70.34    |
| Non-Hispanic African American                                                   | 896                               | 21.29    | 5,017                            | 10.28    | 759                             | 26.15    | 2,249                          | 13.04    |
| Hispanic                                                                        | 378                               | 8.98     | 3,141                            | 6.44     | 381                             | 13.12    | 1,832                          | 10.62    |
| Asian or Pacific Islander                                                       | 156                               | 3.71     | 1,255                            | 2.57     | 136                             | 4.68     | 808                            | 4.68     |
| American Indian/Alaska Native                                                   | 60                                | 1.43     | 425                              | .87      | 28                              | .96      | 143                            | .83      |
| Other                                                                           | 40                                | .95      | 329                              | .67      | 17                              | .59      | 86                             | .50      |
| <b>Rank</b>                                                                     |                                   |          |                                  |          |                                 |          |                                |          |
| Junior enlisted                                                                 | 2,589                             | 61.51    | 24,992                           | 51.21    | 1,310                           | 45.13    | 7,184                          | 41.64    |
| Senior enlisted                                                                 | 1,192                             | 28.32    | 18,431                           | 37.77    | 1,055                           | 36.34    | 6,790                          | 39.36    |
| Junior officer                                                                  | 320                               | 7.60     | 3,372                            | 6.91     | 286                             | 9.85     | 1,499                          | 8.69     |
| Senior officer                                                                  | 69                                | 1.64     | 1,065                            | 2.18     | 212                             | 7.30     | 1,499                          | 8.40     |
| Warrant officer                                                                 | 39                                | 0.93     | 939                              | 1.92     | 40                              | 1.38     | 331                            | 1.92     |
| Probable serious injury during index deployment <sup>b</sup>                    | 70                                | 1.66     | 824                              | 1.69     | 88                              | 3.03     | 385                            | 2.23     |
| Repeat deployment in the post-index year                                        | 50                                | 1.19     | 767                              | 1.57     | 77                              | 2.65     | 465                            | 2.70     |
| Hospitalized since last deployment                                              | 148                               | 3.52     | 1,170                            | 2.40     | 111                             | 3.82     | 430                            | 2.49     |
| Wounded, injured, assaulted, or hurt on index deployment                        | 1,064                             | 25.28    | 11,668                           | 23.91    | 794                             | 27.35    | 4,217                          | 24.44    |
| <b>Cohort<sup>c</sup></b>                                                       |                                   |          |                                  |          |                                 |          |                                |          |
| 2008                                                                            | 409                               | 9.72     | 6,375                            | 13.06    | 505                             | 17.40    | 2,848                          | 16.51    |
| 2009                                                                            | 949                               | 22.55    | 12,128                           | 24.85    | 734                             | 25.28    | 4,350                          | 25.21    |
| 2010                                                                            | 2002                              | 47.56    | 21,252                           | 43.55    | 984                             | 33.90    | 6,142                          | 35.60    |
| 2011                                                                            | 849                               | 20.17    | 9,044                            | 18.53    | 680                             | 23.42    | 3,913                          | 22.68    |
| Received pre-demobilization <sup>d</sup> VHA services as enrollee in VHA system | 550                               | 13.07    | 8,670                            | 17.77    | 468                             | 16.12    | 2,691                          | 15.60    |
| Received pre-demobilization VHA services as non-enrollee                        | 373                               | 8.86     | 3,059                            | 6.27     | 460                             | 15.85    | 1,602                          | 9.29     |
| TRICARE after index deployment                                                  | 1,865                             | 44.31    | 18,808                           | 38.54    | 1,469                           | 50.60    | 7,348                          | 42.59    |
| <b>Residence region at end of index deployment</b>                              |                                   |          |                                  |          |                                 |          |                                |          |
| South                                                                           | 1,997                             | 47.45    | 21,887                           | 44.85    | 1,277                           | 43.99    | 6,756                          | 39.16    |
| West                                                                            | 640                               | 15.21    | 7,611                            | 15.60    | 462                             | 15.91    | 2,739                          | 15.88    |
| Midwest                                                                         | 977                               | 23.21    | 11,743                           | 24.06    | 658                             | 22.67    | 4,355                          | 25.24    |

|                                                                      |             |           |             |           |             |           |             |           |
|----------------------------------------------------------------------|-------------|-----------|-------------|-----------|-------------|-----------|-------------|-----------|
| Northeast                                                            | 595         | 14.14     | 7,558       | 15.49     | 506         | 17.43     | 3,403       | 19.72     |
| Received post-demobilization, pre-PDHRA VHA services as non-enrollee | 68          | 1.62      | 603         | 1.24      | 26          | .90       | 101         | .59       |
| Self-report of Conflict with spouse/family (when measured?)          | 873         | 20.74     | 9,130       | 18.71     | 566         | 19.50     | 2,956       | 17.13     |
| <b>Continuous variables</b>                                          | <b>Mean</b> | <b>SD</b> | <b>Mean</b> | <b>SD</b> | <b>Mean</b> | <b>SD</b> | <b>Mean</b> | <b>SD</b> |
| Age in years                                                         | 27.36       | 8.00      | 29.87       | 8.95      | 29.94       | 9.46      | 31.33       | 9.61      |
| Length (in months) of index deployment                               | 9.28        | 2.31      | 9.12        | 2.28      | 10.02       | 2.48      | 9.98        | 2.46      |
| Number of deployments prior to index deployment                      | .24         | .49       | .44         | .63       | .37         | .62       | .53         | .72       |
| Gap (in months) between demobilization date and index PDHRA date     | 3.10        | 1.62      | 3.10        | 1.78      | 3.76        | 2.18      | 3.88        | 2.16      |
| Drive time (in hours) to nearest VHA facility                        | .52         | .57       | .56         | .58       | .44         | .52       | .48         | .53       |

<sup>a</sup>Measured at month before index deployment unless indicated. <sup>b</sup>Index refers to a deployment ending in FY2008-2011. <sup>c</sup>Cohort refers to fiscal year of index deployment end date.

<sup>d</sup>Demobilization refers to a demobilization after the index deployment.

AR = Army Reserve; ARNG = Army National Guard

Table C Odds ratios associated with control variables<sup>a</sup> as predictors of VHA linkage in the 6 months after demobilized ARNG and AR members' PDHRA questionnaires

|                                                                       | ARNG<br>women<br>N=4,209 |                | ARNG<br>men<br>N=48,799 |                 | AR<br>women<br>N=2,903 |                | AR<br>men<br>N=17,253 |                |
|-----------------------------------------------------------------------|--------------------------|----------------|-------------------------|-----------------|------------------------|----------------|-----------------------|----------------|
|                                                                       | OR                       | CI             | OR                      | CI              | OR                     | CI             | OR                    | CI             |
| <b>Demographic characteristics</b>                                    |                          |                |                         |                 |                        |                |                       |                |
| Age in years                                                          | 1.01                     | 1.001,<br>1.02 | 1.009                   | 1.006,<br>1.011 | 1.01                   | 1.002,<br>1.03 | 1.01                  | 1.001,<br>1.01 |
| Married                                                               | .87                      | .75,<br>1.01   | 1.006                   | .96,<br>1.05    | .76                    | .62,<br>.92    | .88                   | .80,<br>.96    |
| Race/ethnicity (Non-Hispanic White as reference)                      |                          |                |                         |                 |                        |                |                       |                |
| Non-Hispanic<br>African<br>American                                   | 1.09                     | .91,<br>1.31   | .996                    | .93,<br>1.07    | 1.12                   | .90,<br>1.40   | .91                   | .81,<br>1.03   |
| Hispanic                                                              | 1.22                     | .94,<br>1.58   | .98                     | .89,<br>1.07    | 1.13                   | .85,<br>1.48   | 1.01                  | .89,<br>1.16   |
| Asian or Pacific<br>Islander                                          | .62                      | .41,<br>.92    | .97                     | .85,<br>1.12    | .86                    | .55,<br>1.33   | .85                   | .70,<br>1.04   |
| American<br>Indian/Alaska<br>Native                                   | 1.21                     | .68,<br>2.13   | 1.004                   | .81,<br>1.25    | .50                    | .19,<br>1.30   | .86                   | .56,<br>1.34   |
| Other                                                                 | 1.48                     | .74,<br>2.94   | 1.06                    | .83,<br>1.35    | 1.97                   | .69,<br>5.64   | .86                   | .49,<br>1.50   |
| <b>Deployment and demobilization characteristics</b>                  |                          |                |                         |                 |                        |                |                       |                |
| Rank (Junior enlisted as reference)                                   |                          |                |                         |                 |                        |                |                       |                |
| Senior enlisted                                                       | .69                      | .57,<br>.82    | .83                     | .78,<br>.87     | .63                    | .50,<br>.81    | .83                   | .74,<br>.92    |
| Junior officer                                                        | .80                      | .61,<br>1.05   | .69                     | .63,<br>.75     | .63                    | .45,<br>.89    | .63                   | .54,<br>.75    |
| Senior officer                                                        | .59                      | .31,<br>.999   | .72                     | .62,<br>.83     | .51                    | .32,<br>.81    | .72                   | .60,<br>.87    |
| Warrant officer                                                       | .47                      | .22,<br>1.01   | .78                     | .67,<br>.91     | .38                    | .17,<br>.88    | .91                   | .67,<br>1.22   |
| Number of<br>deployments<br>prior to index<br>deployment              | .83                      | .71,<br>.98    | .83                     | .80,<br>.87     | .91                    | .77,<br>1.07   | .89                   | .84,<br>.95    |
| Probable serious<br>injury during<br>index<br>deployment <sup>b</sup> | .96                      | .57,<br>1.61   | .78                     | .67,<br>.92     | .55                    | .31,<br>.96    | 1.11                  | .87,<br>1.41   |
| Cohort <sup>c</sup> (2008 as reference)                               |                          |                |                         |                 |                        |                |                       |                |

|                                                                                 |      |               |      |                |      |               |      |               |
|---------------------------------------------------------------------------------|------|---------------|------|----------------|------|---------------|------|---------------|
| 2009                                                                            | 1.42 | 1.09,<br>1.86 | 1.26 | 1.17,<br>1.36  | 1.21 | .91,<br>1.59  | 1.31 | 1.15,<br>1.48 |
| 2010                                                                            | 1.34 | 1.05,<br>1.71 | 1.20 | 1.12,<br>1.29  | 1.20 | .92,<br>1.56  | 1.25 | 1.11,<br>1.41 |
| 2011                                                                            | 1.27 | .96,<br>1.68  | 1.14 | 1.05,<br>1.24  | .95  | .72,<br>1.27  | 1.08 | .95,<br>1.23  |
| Repeat deployment in the post-index year                                        | .74  | .39,<br>1.41  | .51  | .42,<br>.61    | .50  | .25,<br>.99   | .36  | .26,<br>.50   |
| Residence region at end of index deployment (West as reference)                 |      |               |      |                |      |               |      |               |
| South                                                                           | 1.30 | .96,<br>1.76  | 1.23 | 1.008,<br>1.51 | 1.18 | .87,<br>1.61  | 1.08 | .89,<br>1.29  |
| Midwest                                                                         | 1.89 | 1.36,<br>2.62 | 1.23 | .99,<br>1.52   | 1.45 | 1.04,<br>2.02 | 1.27 | 1.05,<br>1.55 |
| Northeast                                                                       | 1.24 | .87,<br>1.78  | 1.04 | .83,<br>1.32   | 1.14 | .79,<br>1.65  | 1.19 | .96,<br>1.46  |
| Length (in months) of index deployment                                          | .99  | .96,<br>1.03  | 1.01 | .998,<br>1.02  | 1.03 | .99,<br>1.07  | 1.01 | .99,<br>1.03  |
| <b>Health and healthcare characteristics</b>                                    |      |               |      |                |      |               |      |               |
| Hospitalized since last deployment                                              | 1.05 | .73,<br>1.51  | .99  | .87,<br>1.13   | .999 | .63,<br>1.59  | 1.50 | 1.21,<br>1.87 |
| Wounded, injured, assaulted, or hurt on last deployment                         | 1.60 | 1.37,<br>1.86 | 1.78 | 1.70,<br>1.87  | 2.12 | 1.76,<br>2.56 | 1.75 | 1.61,<br>1.90 |
| Received pre-demobilization <sup>d</sup> VHA services as enrollee in VHA system | 2.02 | 1.61,<br>2.53 | 1.94 | 1.84,<br>2.06  | 2.43 | 1.91,<br>3.10 | 2.29 | 2.07,<br>2.53 |
| Received pre-demobilization VHA services as non-enrollee                        | 1.37 | 1.08,<br>1.73 | 1.30 | 1.19,<br>1.41  | 1.48 | 1.17,<br>1.87 | 1.46 | 1.29,<br>1.65 |
| PRIME/TRS after index deployment                                                | .90  | .79,<br>1.04  | .97  | .93,<br>1.01   | .70  | .58,<br>.84   | .92  | .85,<br>1.001 |
| Gap (in months) between demobilization date and index                           | .80  | .76,<br>.84   | .85  | .84,<br>.86    | .84  | .80,<br>.88   | .85  | .83,<br>.87   |

|                                                                      |      |            |      |            |      |           |      |            |
|----------------------------------------------------------------------|------|------------|------|------------|------|-----------|------|------------|
| PDHRA date                                                           |      |            |      |            |      |           |      |            |
| Received post-demobilization, pre-PDHRA VHA services as non-enrollee | 2.45 | 1.43, 4.22 | 1.86 | 1.55, 2.23 | 1.18 | .49, 2.86 | 1.47 | .95, 2.28  |
| Conflict with spouse/family                                          | 1.28 | 1.06, 1.53 | 1.53 | 1.45, 1.62 | 1.21 | .96, 1.53 | 1.55 | 1.40, 1.72 |
| Drive time (in hours) to nearest VHA facility                        | .85  | .74, .96   | .94  | .90, .98   | .69  | .57, .84  | .90  | .83, .97   |

<sup>a</sup>Measured at month before index deployment unless indicated. <sup>b</sup>Index refers to a deployment ending in FY2008-2011. <sup>c</sup>Cohort refers to fiscal year of index deployment end date. <sup>d</sup>Demobilization refers to a demobilization ending in FY2008-12.

AR = Army Reserve; ARNG = Army National Guard; CI = confidence interval; OR = odds ratio; PDHRA = Post-Deployment Health Reassessment questionnaire; VHA = Veterans Health Administration

Table D Characteristics<sup>a</sup> of ARNG and AR, with VHA linkage 6 months post-PDHRA

|                                                                                 | <b>ARNG<br/>women<br/>N=1,731</b> |          | <b>ARNG<br/>men<br/>N=18,659</b> |          | <b>AR<br/>women<br/>N=851</b> |          | <b>AR<br/>men<br/>N=3,927</b> |          |
|---------------------------------------------------------------------------------|-----------------------------------|----------|----------------------------------|----------|-------------------------------|----------|-------------------------------|----------|
| <b>Categorical variables</b>                                                    | <b>N</b>                          | <b>%</b> | <b>N</b>                         | <b>%</b> | <b>N</b>                      | <b>%</b> | <b>N</b>                      | <b>%</b> |
| Married                                                                         | 493                               | 28.48    | 9,835                            | 52.71    | 252                           | 29.61    | 2,011                         | 51.21    |
| <b>Race/ethnicity</b>                                                           |                                   |          |                                  |          |                               |          |                               |          |
| Non-Hispanic White                                                              | 1,118                             | 64.59    | 15,016                           | 80.48    | 441                           | 51.82    | 2,782                         | 70.84    |
| Non-Hispanic African American                                                   | 376                               | 21.72    | 1,908                            | 10.23    | 246                           | 28.91    | 500                           | 12.73    |
| Hispanic                                                                        | 154                               | 8.90     | 1,086                            | 5.82     | 116                           | 13.63    | 442                           | 11.26    |
| Asian or Pacific Islander                                                       | 41                                | 2.37     | 375                              | 2.01     | 35                            | 4.11     | 157                           | 4.00     |
| American Indian/Alaska Native                                                   | 24                                | 1.39     | 158                              | .85      | 6                             | .71      | 28                            | .71      |
| Other                                                                           | 18                                | 1.04     | 116                              | .62      | 7                             | .82      | 18                            | .46      |
| <b>Rank</b>                                                                     |                                   |          |                                  |          |                               |          |                               |          |
| Junior enlisted                                                                 | 1,092                             | 63.08    | 9,682                            | 51.89    | 411                           | 48.30    | 1,676                         | 42.68    |
| Senior enlisted                                                                 | 482                               | 27.85    | 7,246                            | 38.83    | 310                           | 36.43    | 1,636                         | 41.66    |
| Junior officer                                                                  | 123                               | 7.11     | 1,032                            | 30.60    | 74                            | 8.70     | 257                           | 6.54     |
| Senior officer                                                                  | 23                                | 1.33     | 357                              | 1.91     | 47                            | 5.52     | 285                           | 7.26     |
| Warrant officer                                                                 | 11                                | .64      | 342                              | 1.83     | 9                             | 1.06     | 73                            | 1.86     |
| Probable serious injury during index deployment <sup>b</sup>                    | 32                                | 1.85     | 285                              | 1.53     | 22                            | 2.59     | 117                           | 2.98     |
| Repeat deployment in the post-index year                                        | 15                                | .87      | 181                              | .97      | 11                            | 1.29     | 46                            | 1.17     |
| Hospitalized since last deployment                                              | 63                                | 3.64     | 482                              | 2.58     | 33                            | 3.88     | 146                           | 3.72     |
| Wounded, injured, assaulted, or hurt on last deployment                         | 542                               | 31.31    | 5,949                            | 31.88    | 338                           | 39.72    | 1,371                         | 34.91    |
| <b>Cohort<sup>c</sup></b>                                                       |                                   |          |                                  |          |                               |          |                               |          |
| 2008                                                                            | 150                               | 8.67     | 2,137                            | 11.45    | 131                           | 15.39    | 577                           | 14.69    |
| 2009                                                                            | 407                               | 23.51    | 4,886                            | 26.19    | 221                           | 25.97    | 1,026                         | 26.13    |
| 2010                                                                            | 825                               | 47.66    | 8,186                            | 43.87    | 302                           | 35.49    | 1,446                         | 36.82    |
| 2011                                                                            | 349                               | 20.16    | 3,450                            | 18.49    | 197                           | 23.15    | 878                           | 22.36    |
| Received pre-demobilization <sup>d</sup> VHA services as enrollee in VHA system | 304                               | 17.56    | 4,468                            | 23.95    | 212                           | 24.91    | 1,013                         | 25.80    |
| Received pre-demobilization VHA services as non-enrollee                        | 185                               | 10.69    | 1,454                            | 7.79     | 178                           | 20.92    | 525                           | 13.37    |
| TRICARE after index deployment                                                  | 744                               | 42.98    | 7,327                            | 39.27    | 375                           | 44.07    | 1,624                         | 41.35    |
| <b>Residence region at end of index deployment</b>                              |                                   |          |                                  |          |                               |          |                               |          |
| South                                                                           | 768                               | 44.37    | 7,632                            | 40.90    | 368                           | 43.24    | 1,446                         | 36.82    |
| West                                                                            | 223                               | 12.88    | 2,614                            | 14.01    | 122                           | 14.34    | 598                           | 15.23    |

|                                                                      |       |       |       |       |       |       |       |       |
|----------------------------------------------------------------------|-------|-------|-------|-------|-------|-------|-------|-------|
| Midwest                                                              | 496   | 28.65 | 5,379 | 28.83 | 217   | 25.50 | 1,097 | 27.93 |
| Northeast                                                            | 244   | 14.10 | 3,034 | 16.26 | 144   | 16.92 | 786   | 20.02 |
| Received post-demobilization, pre-PDHRA VHA services as non-enrollee | 41    | 2.37  | 339   | 1.82  | 11    | 1.29  | 35    | .89   |
| Conflict with spouse/family                                          | 447   | 25.82 | 4,696 | 25.17 | 213   | 25.03 | 996   | 25.36 |
| Age in years                                                         | 27.57 | 7.94  | 30.17 | 9.01  | 30.11 | 9.45  | 31.45 | 9.62  |
| Length (in months) of index deployment                               | 9.26  | 1.75  | 9.11  | 2.00  | 10.07 | 2.71  | 9.97  | 2.11  |
| Number of deployments prior to index deployment                      | .24   | .50   | .44   | .63   | .39   | .62   | .55   | .71   |
| Gap (in months) between demobilization date and index PDHRA date     | 2.80  | 1.29  | 2.83  | 1.51  | 3.30  | 1.85  | 3.43  | 2.00  |
| Drive time (in hours) to nearest VHA facility                        | .50   | .52   | .54   | .55   | .39   | .49   | .46   | .50   |

<sup>a</sup>Measured at month before index deployment unless indicated. <sup>b</sup>Index refers to a deployment ending in FY2008-2011. <sup>c</sup>Cohort refers to fiscal year of index deployment end date.

<sup>d</sup>Demobilization refers to a demobilization ending in FY2008-11.

AR = Army Reserve; ARNG = Army National Guard; PDHRA = Post-Deployment Health Reassessment questionnaire; VHA = Veterans Health Administration



Table E Percent screening disagreement for AUDIT-C, PHQ-2, and PC-PTSD in PDHRA and VHA

|                   | VHA<br>negative<br>ARNG<br>women |       | VHA<br>negative<br>ARNG<br>men |       | VHA<br>positive<br>ARNG<br>women |      | VHA<br>positive<br>ARNG<br>men |      | VHA<br>negative<br>AR<br>women |       | VHA<br>negative<br>AR men |       | VHA<br>positive<br>AR<br>women |      | VHA<br>positive<br>AR<br>men |      |
|-------------------|----------------------------------|-------|--------------------------------|-------|----------------------------------|------|--------------------------------|------|--------------------------------|-------|---------------------------|-------|--------------------------------|------|------------------------------|------|
|                   | N                                | %     | N                              | %     | N                                | %    | N                              | %    | N                              | %     | N                         | %     | N                              | %    | N                            | %    |
| <b>AUDIT-C</b>    |                                  |       |                                |       |                                  |      |                                |      |                                |       |                           |       |                                |      |                              |      |
| PDHRA<br>negative |                                  |       |                                |       | 57/<br>1,436                     | 3.97 | 991/<br>12,795                 | 7.74 |                                |       |                           |       | 25/<br>729                     | 3.43 | 207/<br>2,832                | 7.31 |
| PDHRA<br>positive | 135/<br>295                      | 45.76 | 2,056/<br>5,864                | 35.06 |                                  |      |                                |      | 65/<br>122                     | 53.28 | 430/<br>1,095             | 39.27 |                                |      |                              |      |
| <b>PHQ-2</b>      |                                  |       |                                |       |                                  |      |                                |      |                                |       |                           |       |                                |      |                              |      |
| PDHRA<br>negative |                                  |       |                                |       | 88/<br>1,517                     | 5.80 | 875/<br>16,788                 | 5.21 |                                |       |                           |       | 64/<br>730                     | 8.77 | 194/<br>3,476                | 5.58 |
| PDHRA<br>positive | 96/<br>214                       | 44.86 | 784/<br>1,871                  | 41.90 |                                  |      |                                |      | 56/<br>121                     | 46.28 | 226/<br>451               | 50.11 |                                |      |                              |      |
| <b>PC-PTSD</b>    |                                  |       |                                |       |                                  |      |                                |      |                                |       |                           |       |                                |      |                              |      |
| PDRHA<br>negative |                                  |       |                                |       | 136/<br>1,536                    | 8.85 | 1,495/<br>16,623               | 8.99 |                                |       |                           |       | 52/<br>733                     | 7.09 | 322/<br>3,420                | 9.42 |
| PDHRA<br>positive | 66/<br>195                       | 33.85 | 509/<br>2,036                  | 25.00 |                                  |      |                                |      | 38/<br>118                     | 32.20 | 141/<br>507               | 27.81 |                                |      |                              |      |

■ Screen negative on PDHRA and screen positive when rescreened within 6 months in VHA.

— Screen positive on PDHRA and screen negative when rescreen within 6 months in VHA.

AR = Army Reserve; ARNG = Army National Guard; AUDIT-C = Alcohol Use Disorder Identification Test consumption; PC-PTSD = Primary Care Posttraumatic Stress Disorder; PHQ-2 = Patient Health Questionnaire; PDHRA = Post-Deployment Health Reassessment questionnaire; VHA = Veterans Health Administration

Table F Recreening, diagnosis and treatment (within 6 months of rescreen) for alcohol misuse, depression, and PTSD in VHA

|                                                               | ARNG women |       | ARNG men     |       | AR women |       | AR men    |       |
|---------------------------------------------------------------|------------|-------|--------------|-------|----------|-------|-----------|-------|
|                                                               | N          | %     | N            | %     | N        | %     | N         | %     |
| <b>Alcohol misuse</b>                                         |            |       |              |       |          |       |           |       |
| Out of sample, had positive AUDIT-C in VHA                    | 177/1,731  | 10.22 | 3,905/18,659 | 20.93 | 71/851   | 8.34  | 720/3,927 | 18.33 |
| Out of those who screened positive, diagnosed with AUD        | 34/177     | 19.21 | 794/3,905    | 20.33 | 18/71    | 25.35 | 159/720   | 22.08 |
| Out of those diagnosed, received AUD specialty care           | 8/34       | 23.53 | 194/794      | 24.43 | 2/18     | 11.11 | 31/159    | 24.53 |
| Out of those diagnosed, received AUD medicine                 | 3/34       | 8.82  | 21/794       | 2.64  | 0/18     | 0     | 7/159     | 4.40  |
| <b>Depression</b>                                             |            |       |              |       |          |       |           |       |
| Out of sample, had positive PHQ-2 score                       | 179/1,731  | 10.34 | 1,637/18,659 | 8.77  | 110/851  | 12.93 | 353/3,927 | 8.99  |
| Out of those who screened positive, diagnosed with depression | 127/179    | 70.95 | 845/1,637    | 51.62 | 71/110   | 64.54 | 189/353   | 53.54 |
| Out of those diagnosed, received depression specialty care    | 94/127     | 74.02 | 621/845      | 73.49 | 55/71    | 76.06 | 143/189   | 75.66 |
| Out of those diagnosed, received MDD first line medicine      | 87/127     | 68.50 | 547/845      | 64.73 | 48/71    | 67.61 | 131/189   | 69.31 |
| Out of those diagnosed, received MDD all-inclusive medicine   | 93/127     | 73.23 | 586/845      | 69.35 | 49/71    | 69.01 | 136/189   | 71.96 |
| <b>PTSD</b>                                                   |            |       |              |       |          |       |           |       |
| Out of sample, had positive PTSD score                        | 244/1,731  | 14.10 | 2,689/18,659 | 14.41 | 119/851  | 13.98 | 616/3,927 | 15.68 |
| Out of those who screened positive, diagnosed with PTSD       | 106/244    | 43.44 | 1,349/2,689  | 50.17 | 56/119   | 47.06 | 336/616   | 54.54 |
| Out of those diagnosed, received PTSD specialty care          | 78/106     | 73.58 | 1,073/1,349  | 79.54 | 47/56    | 83.93 | 266/336   | 79.17 |
| Out of those diagnosed, received PTSD primary medicine        | 59/106     | 55.66 | 746/1,349    | 55.30 | 30/56    | 53.57 | 181/336   | 53.87 |
| Out of those diagnosed, received PTSD all-inclusive medicine  | 61/106     | 57.55 | 789/1,349    | 58.45 | 32/56    | 57.14 | 194/336   | 57.74 |

AR = Army Reserve; ARNG = Army National Guard; MDD = Major Depressive Disorder; PTSD = Posttraumatic Stress Disorder; PHQ-2 = Patient Health Questionnaire; VHA = Veterans Health Administration
